# Supplementary material
Source: Springer Nature journal article supplement (https://www.springermedizin.de/resource/supplementary/12891_2014_2144_MOESM2_ESM.pdf/9509474)

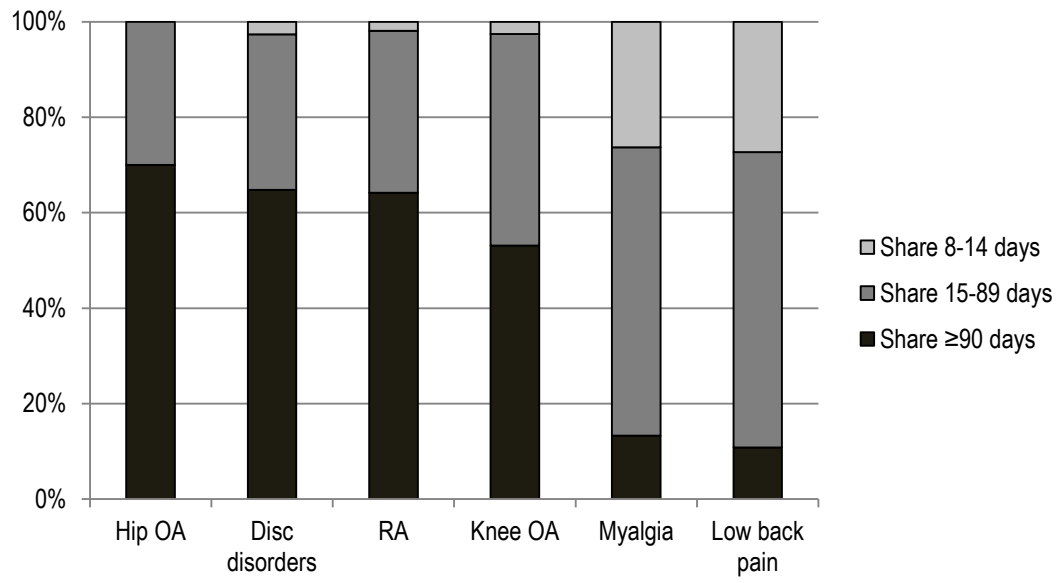

Supplement: MOESM2 [file 9509474]
